# Supplementary material
Source: publisher figshare collection journal article supplement (https://sage.figshare.com/ndownloader/files/33082522)
Supplement: Supplementary file 1 [file 33082522]

# The Biomechanical and Histological Processes of Rerouting Biceps to Treat Chronic Irreparable Rotator Cuff Tears in a Rabbit Model

## Appendix

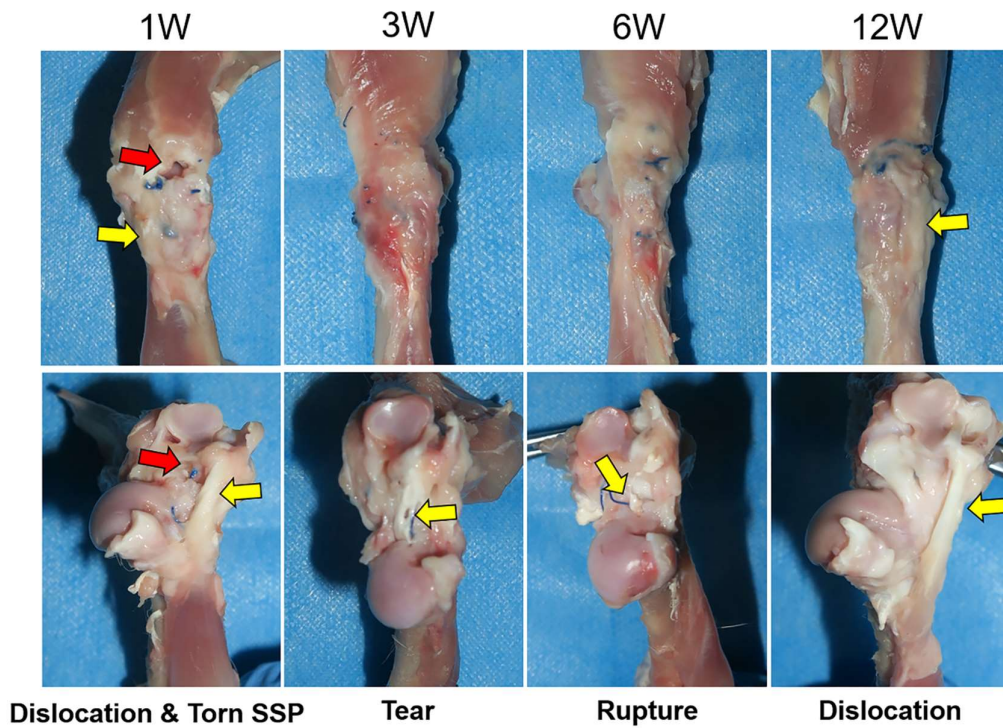

**Figure A1.** The complications occurred after biceps was rerouted. Red arrows were failure sites of SSP tendon and the yellow ones were failure sites of biceps. SSP, supraspinatus.

**TABLE A1.** Failure Modes of Intra-articular portions of Rerouting-biceps

|                              | 1W | 3W | 6W | 9W | 12W | NSC |
|------------------------------|----|----|----|----|-----|-----|
| Midsubstance rupture         | 0  | 0  | 3  | 5  | 6   | 6   |
| Full-out failure from groove | 6  | 6  | 3  | 1  | 0   | 0   |

NSC, native superior capsule.

**TABLE A2.** Failure Modes of Extra-articular Portions of Rerouting-biceps

|                              | 1W | 3W | 6W | 9W | 12W | NB |
|------------------------------|----|----|----|----|-----|----|
| Midsubstance rupture         | 0  | 2  | 4  | 5  | 6   | 0  |
| Full-out failure from groove | 6  | 4  | 2  | 1  | 0   | 0  |
| Bone avulsion fracture       | 0  | 0  | 0  | 0  | 0   | 6  |

NB, native biceps.

**TABLE A3.** Failure load and Stiffness of Intra-articular Portions of Rerouting-biceps

|                  | 1W              | 3W              | 6W                | 9W               | 12W              | NB               |
|------------------|-----------------|-----------------|-------------------|------------------|------------------|------------------|
| Failure load (N) | $2.35 \pm 1.50$ | $6.33 \pm 4.68$ | $38.33 \pm 10.46$ | $63.83 \pm 5.46$ | $65.50 \pm 8.78$ | $22.83 \pm 3.90$ |
| Stiffness (N/mm) | $2.13 \pm 0.86$ | $7.17 \pm 3.87$ | $13.33 \pm 3.50$  | $31.67 \pm 4.18$ | $38.00 \pm 4.90$ | $13.83 \pm 2.14$ |

NSC, native superior capsule.

**TABLE A4.** Failure load and Stiffness of Extra-articular Portions of Rerouting-biceps

|                  | 1W              | 3W              | 6W               | 9W               | 12W              | NB               |
|------------------|-----------------|-----------------|------------------|------------------|------------------|------------------|
| Failure load (N) | $2.13 \pm 1.80$ | $7.33 \pm 2.42$ | $42.33 \pm 5.96$ | $62.33 \pm 7.69$ | $69.33 \pm 6.98$ | $51.67 \pm 3.27$ |
| Stiffness (N/mm) | $2.33 \pm 1.91$ | $6.83 \pm 6.82$ | $13.16 \pm 6.27$ | $32.33 \pm 6.50$ | $39.67 \pm 4.27$ | $21.17 \pm 2.86$ |

NB, native biceps.
